# Supplementary material
Source: MDPI journal article supplement (https://www.mdpi.com/2073-4352/11/12/1571)
Supplement: s1 [file s1]

## Article

# Potassium Sulfate: A New Candidate to Explore Non-Photochemical Laser-Induced Nucleation Mechanisms

Mélody Briard <sup>1</sup>, Clément Brandel <sup>1,\*</sup>, Sandrine Morin-Grognon <sup>2</sup>, Gérard Coquerel <sup>1</sup>, and Valérie Dupray <sup>1</sup>

<sup>1</sup> Normandie Université, UNIROUEN, SMS, 76000 Rouen, France

<sup>2</sup> Normandie Université, UNIROUEN, INSA Rouen, CNRS, PBS, 55 rue Saint-Germain, 27000 Évreux, France

\* Correspondence: clement.brandel@univ-rouen.fr

## Supplementary Information:

### 1. Surface Analysis of the Inner Surface of the Vials

#### a. AFM Analysis

The AFM analysis was conducted in the air contact mode, with a classic pyramid C-probe (0.38N/m), at scanning speed from 0.5 to 1Hz. Images were produced at different scales to obtain a global view of the sample and a more detailed view (Figure S1). The measured roughness values are presented in Table 1; the average roughness (Ra) and maximum roughness (Rz) for the three samples are of the same order of magnitude.

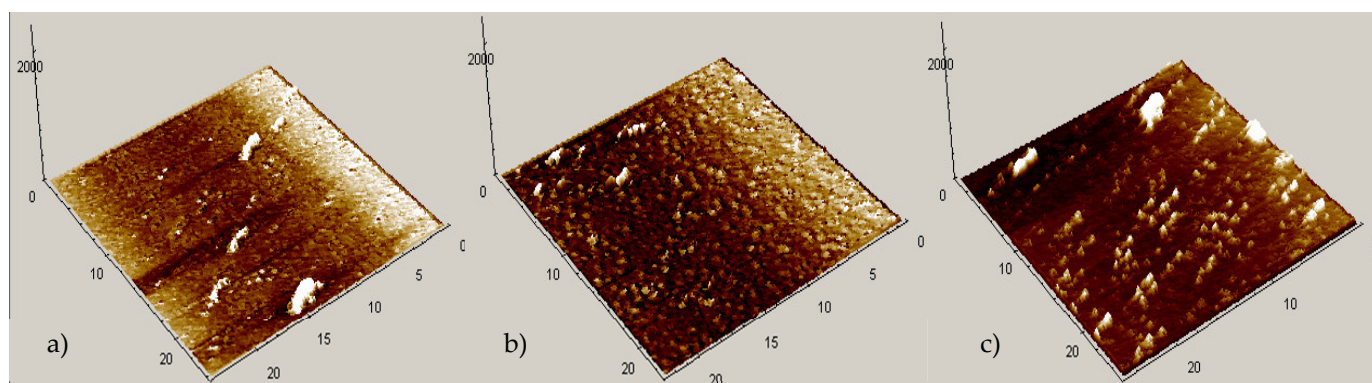

**Figure S1.** 3D representation of the inner surface roughness of the vial measured by atomic force microscopy (AFM): (a) a piece of control vial without any laser exposure; (b) and (c) a piece of vial exposed to 100 pulses at 85.6 mJ, respectively, the entry face and the exit face of the laser beam. The size of the surface analyzed is 25  $\mu\text{m}$   $\times$  25  $\mu\text{m}$ .

**Table S1.** Roughness average (Ra) and maximum roughness (Rz) measured for control vial and irradiated vial (entry face and exit face of the laser beam).

|                         | Roughness average (Ra) | Roughness max (Rz) |
|-------------------------|------------------------|--------------------|
| Control Vial            | 7 nm                   | 340 nm             |
| Irradiated Vial (Entry) | 18 nm                  | 453 nm             |
| Irradiated Vial (Exit)  | 20 nm                  | 380 nm             |

#### b. SEM Analysis

Images were obtained with a Jeol JCM 5000 NeoScope instrument. Glass vial samples were coated with a gold layer prior to analysis (Neo coater MP-19020NCTR).

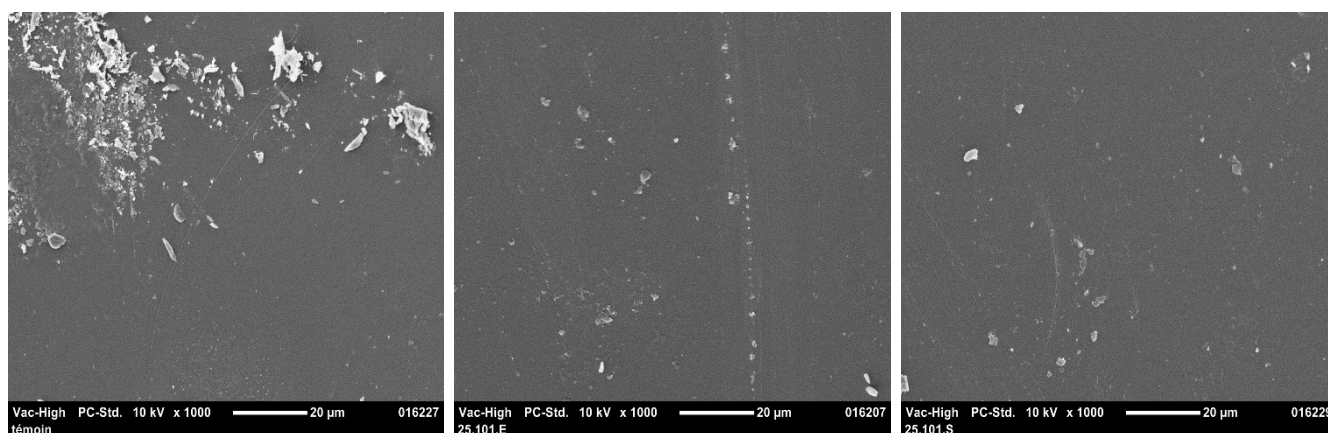

**Figure S2.** Scanning electron microscopy (SEM) images. From left to right: control vial, vial entry face, and vial exit face of the laser beam.
